# Supplementary material for: A New Level of Plasticity:DrosophilaSmooth-like Testes Muscles Compensate Failure of Myoblast Fusion
Source: Oxford University Press journal article supplement (doi:10.1242/dev.126730), 2015-01-01
Supplement: dev126730supp.pdf [file dev126730supp.pdf]

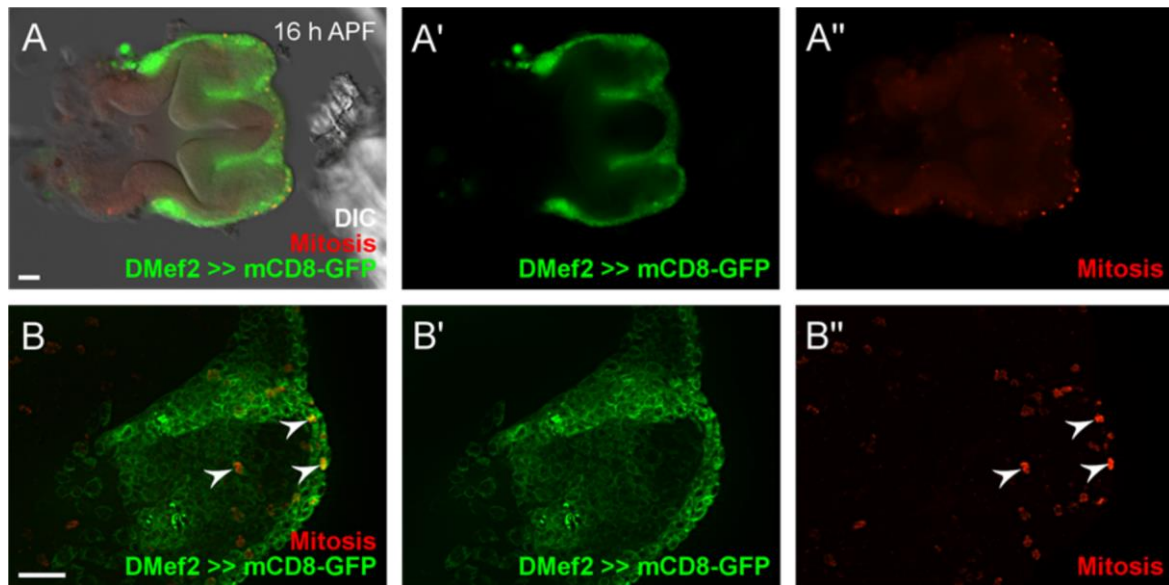

**Figure S1: Myoblasts on early genital discs undergo mitosis**

(A–A'') Genital discs at 16 hours APF. (B–B'') Myoblasts at 16 hours APF. (A, B) Merged photo of A' and A'', and B' and B'', respectively. (A', B') Expression of *DMef2*-driven mCD8-GFP (green) as a marker for myoblasts. (A'', B'') Staining with anti-phospho Histone H3 (Ser10) Mitosis Marker (red). Proliferation occurred in the epithelium of the genital disc as well as in the myoblasts (arrowheads). Scale bars: 20  $\mu$ m.

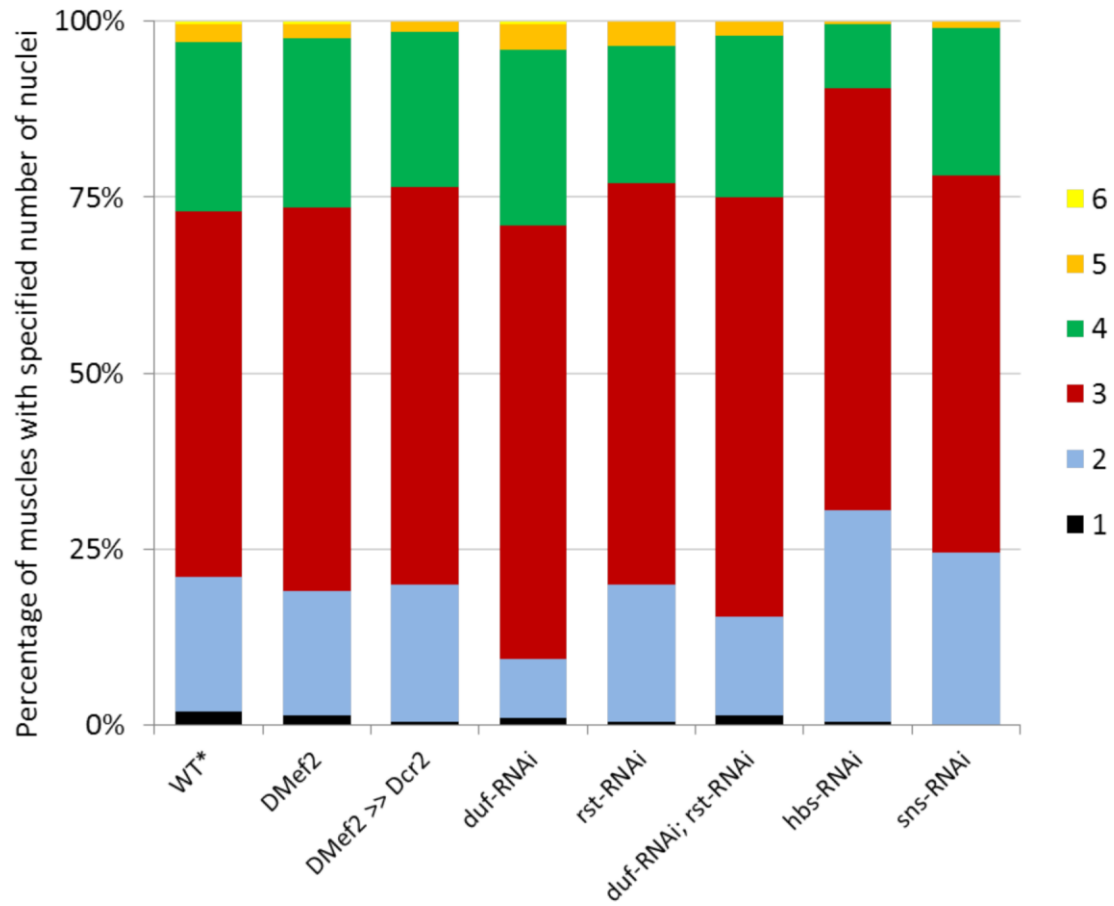

**Figure S2: Number of nuclei in testes muscles in control flies**

The number of nuclei in nascent myotubes was determined in the given genetic backgrounds at about 42 hours APF. In each case, 200 muscle cells (100% of the cells) were counted; the length of each colour-coded bar in each stack indicates the percentage of muscles with the specified number of nuclei. \*Wild-type data are also shown in Fig. 5.

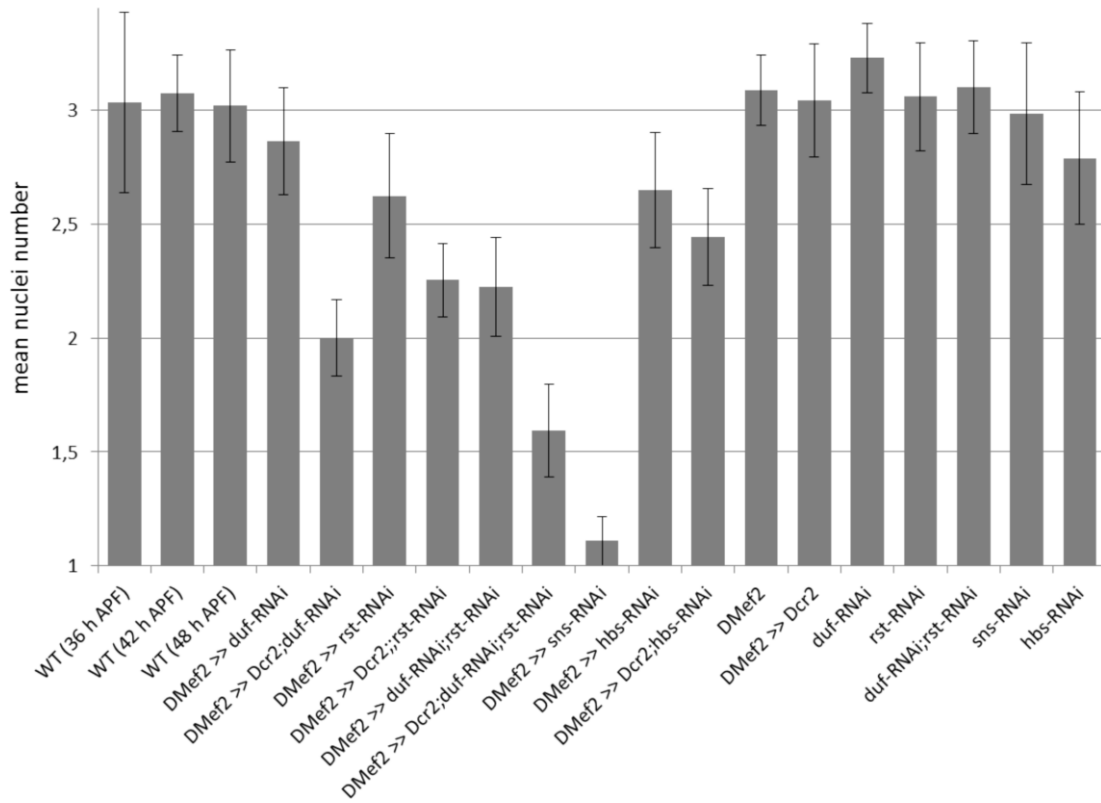

**Figure S3: Mean nuclei number in RNAi-mediated knock-down flies and controls**

The mean number of nuclei in nascent myotubes in the given genetic backgrounds as listed in Table S2. Error bars represent standard deviation.

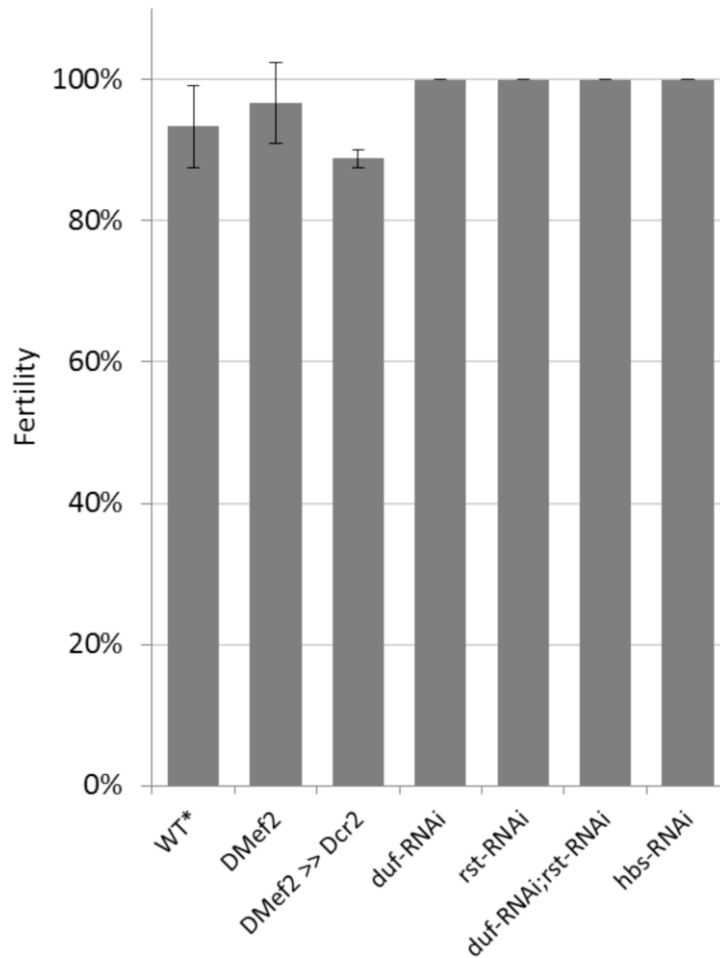

**Figure S4: Fertility of control males**

The fertility of males in the given different genetic background was tested in up to 30 single crossing with wild-type females. Error bars represent standard deviation. \*Wild-type data are also shown in Fig. 6.

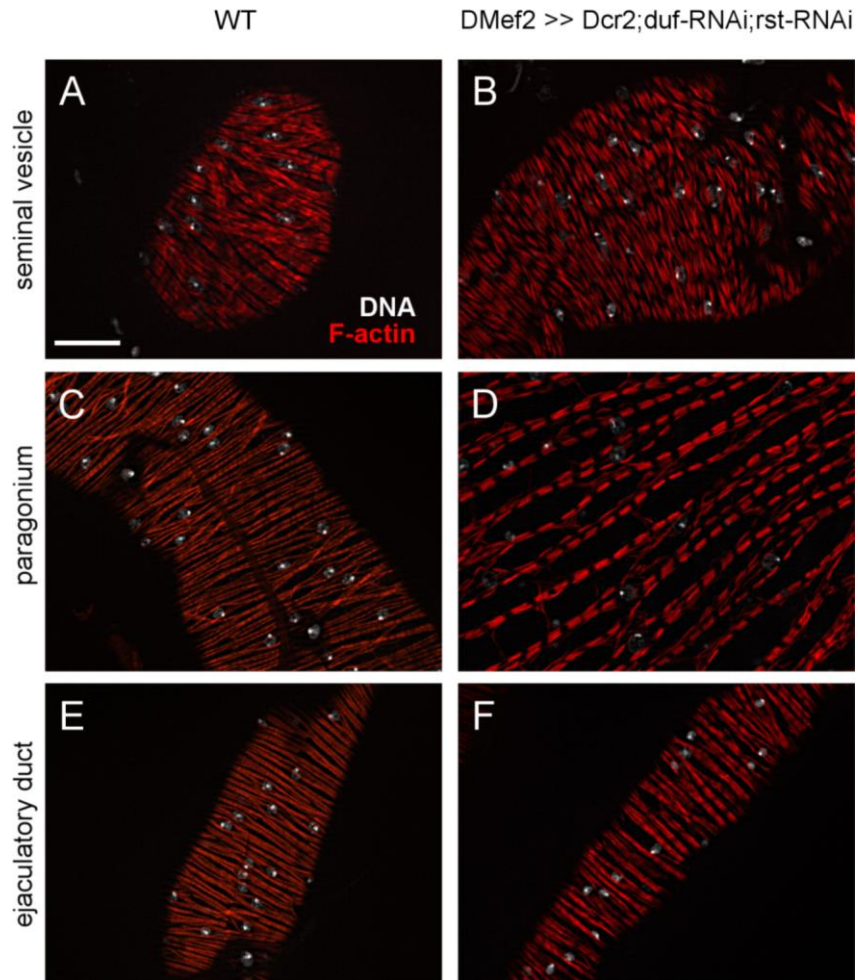

**Figure S5: Sarcomere arrangement of reproductive muscles appears normal in *duf* and *rst* knock-down flies**

Comparison of sarcomere arrangement in (A, C, E) wild-type males and (B, D and F) *DMef2*-driven *Dcr2; duf-RNAi; rst-RNAi* double knock-down males. The filament arrangement of the (A, B) seminal vesicle muscles, (C, D) paragonia muscles and (E, F) ejaculatory duct muscles of the wild-type and the knock-down males are similar. No alterations are visible. F-Actin was stained with Phalloidin; Hoechst was used to label DNA in nuclei. All pictures are optical sections. Scale bar: 20  $\mu$ m.

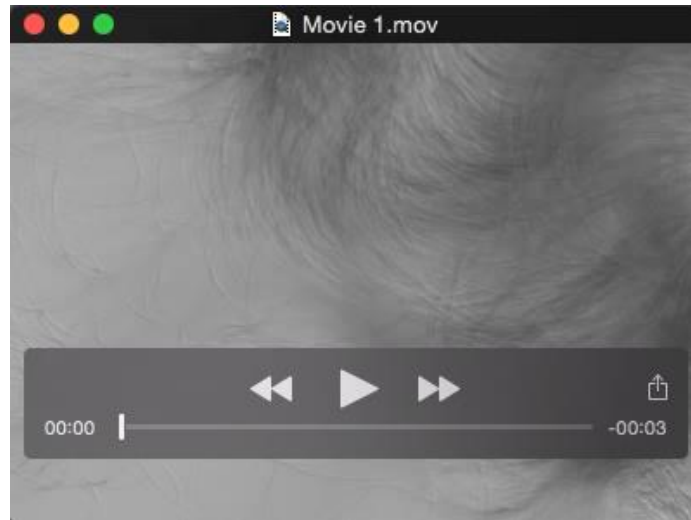

Legend to movie 1:

The mature sperm of *duf;rst* double knock down males are motile. Seminal vesicles of adult males (*DMef2* driven *Dcr-2*; *dufRNAi*; *rstRNAi*) were squashed in PBS, so that numerous sperm were released. To visualize the motility of sperm, a movie was taken at a Zeiss AxioObserver Z.1 at 10fold increased time lapse recording.

**Table S1: RT-PCR results of FC-specific determination factors of embryonic myogenesis in genital disc myoblasts**

| Gene                  | Transcription <sup>a</sup> |                 |                 |                 | Reference                                        |
|-----------------------|----------------------------|-----------------|-----------------|-----------------|--------------------------------------------------|
|                       | 8 hours<br>APF             | 16 hours<br>APF | 24 hours<br>APF | 30 hours<br>APF |                                                  |
| <i>vestigial</i>      | –                          | –               | +               | +               | Deng et al., 2009                                |
| <i>ladybird early</i> | +                          | +               | +               | +               | Jagla et al., 1998                               |
| <i>even skipped</i>   | +                          | +               | +               | +               | Frasch et al., 1987;<br>Su et al., 1999          |
| <i>apterous</i>       | +                          | +               | +               | +               | Bourgouin et al., 1992                           |
| <i>slouch (S59)</i>   | +                          | –               | –               | –               | Dohrmann et al., 1990;<br>Knirr et al., 1999     |
| <i>kriippel</i>       | –                          | –               | –               | –               | Ruiz-Gomez et al., 1997                          |
| <i>drop</i>           | +                          | +               | +               | +               | Nose et al., 1998                                |
| <i>nautilus</i>       | +                          | +               | +               | +               | Balagopalan et al., 2001;<br>Keller et al., 1998 |

<sup>a</sup> +, transcript detected; –, no transcripts detected

**Balagopalan, L., Keller, C. A. and Abmayr, S. M.** (2001). Loss-of-function mutations reveal that the *Drosophila* nautilus gene is not essential for embryonic myogenesis or viability. *Dev Biol* **231**, 374-382.

**Bourgouin, C., Lundgren, S. E. and Thomas, J. B.** (1992). Apterous is a *Drosophila* LIM domain gene required for the development of a subset of embryonic muscles. *Neuron* **9**, 549-561.

**Deng, H., Hughes, S. C., Bell, J. B. and Simmonds, A. J.** (2009). Alternative requirements for Vestigial, Scalloped, and Dmef2 during muscle differentiation in *Drosophila melanogaster*. *Mol Biol Cell* **20**, 256-269.

**Dohrmann, C., Azpiazu, N. and Frasch, M.** (1990). A new *Drosophila* homeo box gene is expressed in mesodermal precursor cells of distinct muscles during embryogenesis. *Genes Dev* **4**, 2098-2111.

**Frasch, M., Hoey, T., Rushlow, C., Doyle, H. and Levine, M.** (1987). Characterization and localization of the even-skipped protein of *Drosophila*. *EMBO J* **6**, 749-759.

**Jagla, T., Bellard, F., Lutz, Y., Dretzen, G., Bellard, M. and Jagla, K.** (1998). ladybird determines cell fate decisions during diversification of *Drosophila* somatic muscles. *Development* **125**, 3699-3708.

**Keller, C. A., Grill, M. A. and Abmayr, S. M.** (1998). A role for nautilus in the differentiation of muscle precursors. *Dev Biol* **202**, 157-171.

**Knirr, S., Azpiazu, N. and Frasch, M.** (1999). The role of the NK-homeobox gene slouch (S59) in somatic muscle patterning. *Development* **126**, 4525-4535.

**Nose, A., Isshiki, T. and Takeichi, M.** (1998). Regional specification of muscle progenitors in *Drosophila*: the role of the msh homeobox gene. *Development* **125**, 215-223.

**Ruiz-Gomez, M., Romani, S., Hartmann, C., Jackle, H. and Bate, M.** (1997). Specific muscle identities are regulated by Kruppel during *Drosophila* embryogenesis. *Development* **124**, 3407-3414.

**Su, M. T., Fujioka, M., Goto, T. and Bodmer, R.** (1999). The *Drosophila* homeobox genes *zfh-1* and *even-skipped* are required for cardiac-specific differentiation of a numb-dependent lineage decision. *Development* **126**, 3241-3251.



**Table S2: Detailed summary of nuclei numbers in RNAi-mediated knock-down flies and controls and their fertility**

| Fly strain                        | Nuclei number in testes muscles |      |      |      |      |      | Mean nuclei number<br>± s.d. | Male fertility      |                        | Viability    | Ability to fly |
|-----------------------------------|---------------------------------|------|------|------|------|------|------------------------------|---------------------|------------------------|--------------|----------------|
|                                   | 1                               | 2    | 3    | 4    | 5    | 6    |                              | Number of crossings | Crossings with progeny |              |                |
| WT (36 h APF)                     | 0                               | 46   | 106  | 44   | 3    | 1    | 3,035±0.40                   |                     |                        |              |                |
| WT (42 h APF)                     | 4                               | 38   | 104  | 48   | 5    | 1    | 3.075±0.17                   | 30                  | 28                     | viable       | yes            |
| WT (48 h APF)                     | 1                               | 44   | 108  | 44   | 3    | 0    | 3.02±0.25                    |                     |                        |              |                |
| DMef2 >> duf-RNAi                 | 2                               | 63   | 97   | 36   | 2    | 0    | 2.865 ±0.23                  | 30                  | 29                     | viable       | yes            |
| DMef2 >> Dcr2;duf-RNAi            | 31                              | 140  | 27   | 2    | 0    | 0    | 2 ±0.17                      | 29                  | 29                     | viable       | yes            |
| DMef2 >> rst-RNAi                 | 4                               | 79   | 105  | 12   | 0    | 0    | 2.625 ±0.27                  | 30                  | 30                     | viable       | yes            |
| DMef2 >> Dcr2;;rst-RNAi           | 13                              | 127  | 56   | 4    | 0    | 0    | 2.255 ±0.17                  | 28                  | 26                     | viable       | yes            |
| DMef2 >> duf-RNAi;rst-RNAi        | 17                              | 124  | 56   | 3    | 0    | 0    | 2.225 ±0.22                  | 30                  | 29                     | viable       | yes            |
| ♂ DMef2 >> Dcr2;duf-RNAi;rst-RNAi | 95                              | 91   | 14   | 0    | 0    | 0    | 1.595 ±0.20                  | 29                  | 9                      | viable       | flightless     |
| ♀ DMef2 >> Dcr2;duf-RNAi;rst-RNAi | n.d.                            | n.d. | n.d. | n.d. | n.d. | n.d. | n.d.                         | 28                  | 2                      | viable       | flightless     |
| DMef2 >> sns-RNAi                 | 181                             | 16   | 3    | 0    | 0    | 0    | 1.11 ±0.11                   | n.d.                | n.d.                   | pupal lethal | n.d.           |
| DMef2 >> hbs-RNAi                 | 11                              | 72   | 100  | 16   | 1    | 0    | 2.62 ±0.25                   | 30                  | 30                     | viable       | yes            |
| DMef2 >> Dcr2;hbs-RNAi            | 10                              | 102  | 77   | 11   | 0    | 0    | 2.445 ±0.21                  | 30                  | 30                     | viable       | yes            |
| DMef2                             | 3                               | 35   | 109  | 48   | 4    | 1    | 3.09 ±0.15                   | 30                  | 29                     | viable       | yes            |
| DMef2 >> Dcr2                     | 1                               | 39   | 113  | 44   | 3    | 0    | 3.045 ±0.25                  | 27                  | 24                     | viable       | yes            |
| duf-RNAi                          | 2                               | 17   | 123  | 50   | 7    | 1    | 3.23 ±0.15                   | 29                  | 29                     | viable       | yes            |
| rst-RNAi                          | 1                               | 39   | 114  | 39   | 7    | 0    | 3.06 ±0.24                   | 29                  | 29                     | viable       | yes            |
| duf-RNAi;rst-RNAi                 | 3                               | 28   | 119  | 46   | 4    | 0    | 3.1 ±0.20                    | 30                  | 30                     | viable       | yes            |
| sns-RNAi                          | 0                               | 49   | 107  | 42   | 2    | 0    | 2.985 ±0.31                  | n.d.                | n.d.                   | n.d.         | n.d.           |
| hbs-RNAi                          | 1                               | 60   | 120  | 18   | 1    | 0    | 2.79 ±0.29                   | 30                  | 30                     | viable       | yes            |

n.d.: not determined; ± s.d.: standard deviation

**Table S3: Oligonucleotides used for RT-PCR analyses**

| Oligonucleotide | Sequence                |
|-----------------|-------------------------|
| NotchRTfwd      | CGAGCTATGAGGATTGCATC    |
| NotchRTrev      | CATGCCTCATCGCCTGAATGTG  |
| DeltaRTfwd      | GTACCTTCTCGCTGATCGTCG   |
| DeltaRTfwd      | GTGACAGTAATCGCCCTGCC    |
| LmdRTfwd        | GCAATAAAGCATTCTCGCGTTTG |
| LmdRTrev        | GCAATTGCTGCGGTCTGTCGTC  |
| dufRT1fwd       | GCACGAGATTCAACAGTCGCAG  |
| dufRT1rev       | GCTGCTGGCGGTCAAGTTGG    |
| rstRT1fwd       | TGCCACCGAGGATCGCAAAG    |
| rstRT1rev       | GCAGCGGTATCACCGTGTAC    |
| snsRT1fwd       | CTGCACATCAAGGACGCGAAG   |
| snsRT1rev       | CTCGTAGGTCAGCGAATCAATC  |
| hbsRT1fwd       | GTGTGGAGCGCAGTGATATTGG  |
| hbsRT1rev       | CTTGAGATCCTTGCCATGACGAC |
| Tplsense        | GAGTGCATCACGTGAATGGG    |
| Tplantisense    | GCCACGCTGATCCGCATTC     |
| VgRTfwd         | GACTTGTATGGCACCGCGAC    |
| VgRTrev         | GATTCCTGTACTTGCGCCACCTG |
| KrRTfwd         | GATGTCCATATCAATGCTTC    |
| KrRTrev         | CCATGAATGCGGCAGCTTGAC   |
| LbeRTfwd        | GAGCGTTCCCAGCGATCGAG    |
| LbeRTrev        | CGTTCGACAGTCCCAGTGAG    |
| EveRTfwd        | CTACAACATGGAGAGCCACCATG |
| EveRTrev        | GTGCTCTCCGGGAGGTTTCAG   |
| ApRTfwd         | CATCCAGTATGAGCGCCACCTAC |
| ApRTrev         | CATGGTACGCAGCTGGTGATGC  |
| SlouRTfwd       | GACATGGATCAGGACGATATG   |
| SlouRTrev       | GTGGGGGAGTTGACATCCATGC  |
| NauRTfwd        | GCAGTCTCAGCTCCGAGGAGC   |
| NauRTrev        | CGATATACTCGATGGCATTGC   |
| Dr-mshRTfwd     | CTCTCACATGCAATCCACGATAC |
| Dr-mshRTrev     | GTTCGGCGATGCTCAGGTTACTG |
